# Supplementary material for: Innovative localized surface plasmon resonance sensing technique for a green spectrofluorimetric assay of ketoprofen, paracetamol and chlorzoxazone in pharmaceutical preparations and biological fluids
Source: Royal Society of Chemistry journal article supplement (doi:10.1039/d2ra04725j), 2022-01-01
Supplement: d2ra04725j1.pdf [file d2ra04725j1.pdf]

### Supplementary Material

#### **Innovative Localized Surface Plasmon Resonance Sensing Technique for a Green Spectrofluorimetric Assay of Ketoprofen, Paracetamol and Chlorzoxazone in Pharmaceutical Preparations and Biological Fluids**

Nora A. Abdallah\*, Mona E. Fathy, Manar M. Tolba, Amina M. El-Brashy and Fawzia A. Ibrahim

Department of Pharmaceutical Analytical Chemistry, Faculty of Pharmacy,  
Mansoura University, Mansoura 35516, Egypt.

\*Corresponding author.

Tel.: +20502246253, Fax: +20502363641, E-mail: [noraabdallah91@mans.edu.eg](mailto:noraabdallah91@mans.edu.eg)

**Figure S1:** Fluorescence spectra of 2 µg/mL CLX in ethanol, a is excitation spectrum and a\* is emission spectrum.

**Figure S2:** Influence of pH on the  $\Delta F$  using 3 µg/mL of the studied drugs and 1 ml of Britton Robinson buffer pH (3-10).

**Figure S3:** Effect of contact time between silver NPs and 3 µg/mL of each drug from starting to 30 min.

**Table S1:** Linearity range comparison of fluorometric methods for the determination of KPN.

**Table S2:** Assay results for determination of the raw materials of KPN, PAR and CLX by the proposed method.

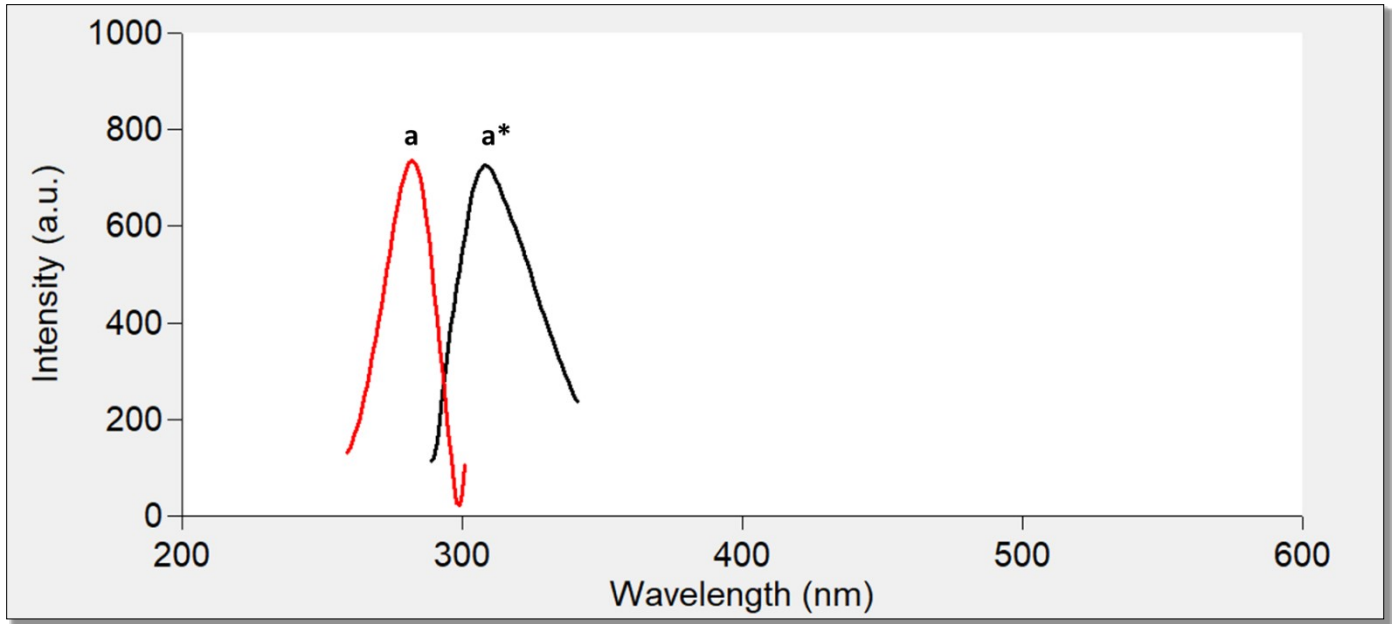

Figure S1

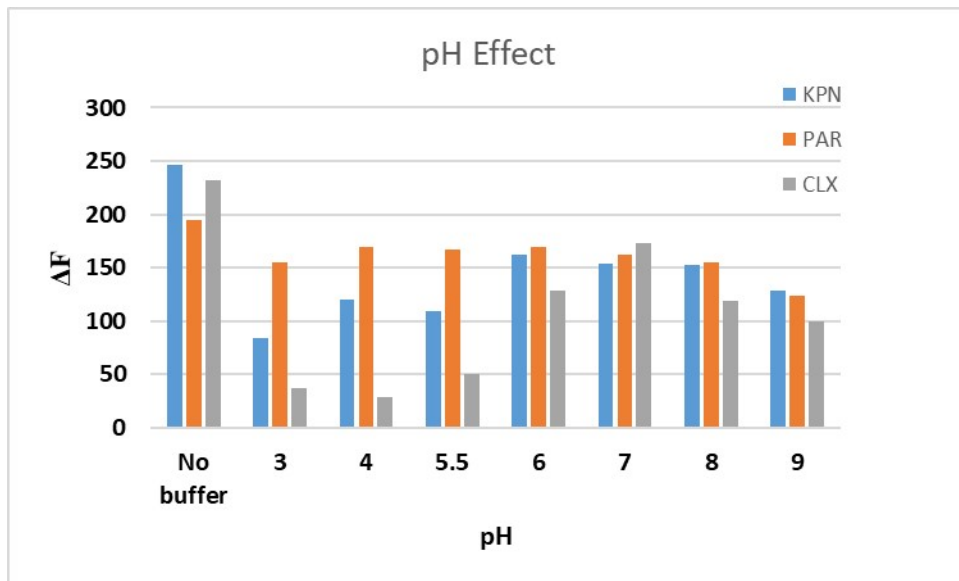

Figure S2

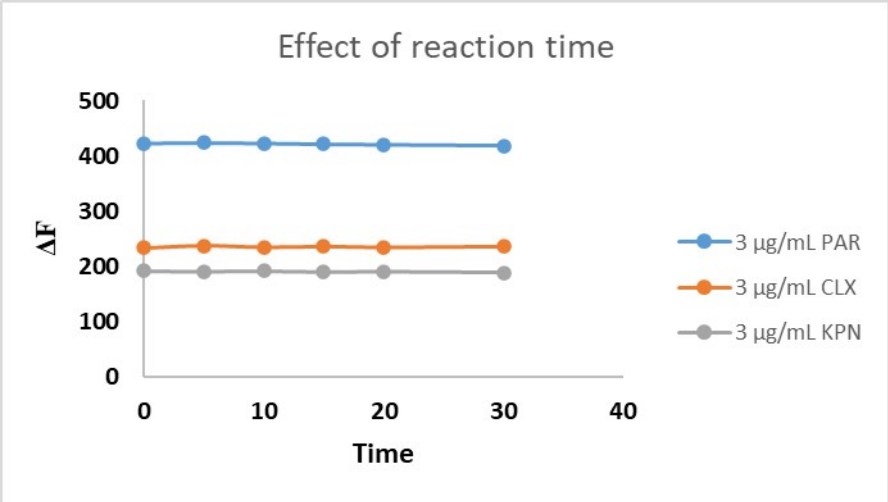

Figure S3

**Table S1:** Linearity range comparison of reported methods and proposed method for the determination of KPN.

| Method                                                                                                          | Linearity range                                  | Reference               |
|-----------------------------------------------------------------------------------------------------------------|--------------------------------------------------|-------------------------|
| Ion chromatography with a fluorescence detector                                                                 | 0.2–1.5 mg kg <sup>-1</sup>                      | [5]                     |
| Derivative IR spectroscopy                                                                                      | (1000 to 4000) µg/ml                             | [6]                     |
| HPLC                                                                                                            | 0.025-0.5 mg/mL                                  | [7]                     |
| Electrochemical method                                                                                          | 9 µM to 5 mM                                     | [8]                     |
| Liquid chromatography/tandem mass spectrometry following automated solid-phase extraction in the 96-well format | 0.05 to 2500 ng/ml                               | [9]                     |
| Gas chromatography-mass spectrometry                                                                            | 0.6-5000 ng/kg                                   | [10]                    |
| Terbium sensitized luminescence method                                                                          | 2.8 x 10 <sup>-7</sup> -3.1 x 10 <sup>-6</sup> M | [11]                    |
| Copper-doped CdS quantum dots and zinc oxide nanorods                                                           | 0.05–35.5 µM                                     | [12]                    |
| Hybrid nanoparticle-based fluorescence switch                                                                   | 0–25.0 µM                                        | [13]                    |
| Quenching of quantum dots                                                                                       | 0.03–0.393 mM                                    | [14]                    |
| Surface Molecularly Imprinted Carbon Dots                                                                       | 0.039–3.9 µM                                     | [15]                    |
| Quenching of silver nanoparticles                                                                               | 0.0019-0.019 µM                                  | <b>Suggested method</b> |

**Table S2:** Assay results for determination of the raw materials of KPN, PAR and CLX by the proposed method.

| KPN                                 |                                     |                      | PAR                                 |                                     |                      | CLX                                 |                                     |                      |
|-------------------------------------|-------------------------------------|----------------------|-------------------------------------|-------------------------------------|----------------------|-------------------------------------|-------------------------------------|----------------------|
| Conc. taken<br>( $\mu\text{g/mL}$ ) | Conc. found<br>( $\mu\text{g/mL}$ ) | % Found <sup>a</sup> | Conc. taken<br>( $\mu\text{g/mL}$ ) | Conc. found<br>( $\mu\text{g/mL}$ ) | % Found <sup>a</sup> | Conc. taken<br>( $\mu\text{g/mL}$ ) | Conc. found<br>( $\mu\text{g/mL}$ ) | % Found <sup>a</sup> |
| 0.5                                 | 0.498                               | 99.60                | 0.15                                | 0.15                                | 100.00               | 0.5                                 | 0.493                               | 98.60                |
| 1.0                                 | 0.992                               | 99.20                | 0.3                                 | 0.304                               | 101.33               | 1.0                                 | 0.989                               | 98.90                |
| 1.5                                 | 1.496                               | 99.73                | 0.9                                 | 0.885                               | 98.33                | 2.0                                 | 2.007                               | 100.35               |
| 2.5                                 | 2.513                               | 100.52               | 1.5                                 | 1.503                               | 100.20               | 3.0                                 | 3.013                               | 100.43               |
| 3.0                                 | 3.025                               | 100.83               | 1.8                                 | 1.802                               | 100.11               | 4.0                                 | 4.037                               | 100.93               |
| 4.0                                 | 4.013                               | 100.33               | 2.4                                 | 2.407                               | 100.29               | 5.0                                 | 5.028                               | 100.56               |
| 5.0                                 | 4.951                               | 99.02                | 3                                   | 2.997                               | 99.90                | 6.0                                 | 6.057                               | 100.95               |
|                                     |                                     |                      |                                     |                                     |                      | 7.0                                 | 6.955                               | 99.36                |
|                                     |                                     |                      |                                     |                                     |                      | 8.0                                 | 8.006                               | 100.08               |
|                                     |                                     |                      |                                     |                                     |                      | 9.0                                 | 8.939                               | 99.32                |
| <b>Mean</b>                         |                                     | 99.98                |                                     |                                     | 100.023              |                                     |                                     | 99.95                |
| <b>± S.D.</b>                       |                                     | 0.678                |                                     |                                     | 0.885                |                                     |                                     | 0.844                |

<sup>a</sup> Average of three separate determinations
